# Supplementary material for: Increased In Vivo Exposure of N-(4-Hydroxyphenyl) Retinamide (4-HPR) to Achieve Plasma Concentrations Effective against Dengue Virus
Source: MDPI journal article supplement (doi:10.3390/pharmaceutics15071974), 2023-07-18
Supplement: s1 [file s1]

**Martin, A.J. et al.** “Increased *in vivo* exposure of N-(4-hydroxyphenyl) retinamide (4-HPR) to achieve plasma concentrations effective against dengue virus”

## Supplementary Data

**Table S1.** Composition of formulations used in mouse PK studies.

| Formulation* | Composition                                                                                       | Target Dose (mg/kg) | Dose Volume (mL/kg) |
|--------------|---------------------------------------------------------------------------------------------------|---------------------|---------------------|
| HC           | 92% w/v corn oil, 8% w/v polysorbate 80                                                           | 20                  | 3                   |
| MDE          | 5% v/v ethanol, 95% v/v RPMI 1640 containing 10% v/v FBS                                          | 20                  | 8.8                 |
| HPMC-SV      | 0.5% w/v hydroxypropylmethyl cellulose, 0.4% v/v polysorbate 80, 0.5% v/v benzyl alcohol in water | 20                  | 3                   |
| N23          | 50% w/v Maisine CC, 10% w/v Ethanol, 40% w/v Tween 85                                             | 20                  | 2                   |
| N25          | 25% w/v Maisine CC, 25% w/v Lauroglycol 90, 10% w/v Ethanol, 40% w/v Tween 85                     | 20                  | 3                   |
| IV           | 10% v/v DMSO, 90% v/v PEG400                                                                      | 2                   | 2                   |

\*HC: human clinical; MDE: mouse dengue efficacy; HPMC-SV: hydroxypropylmethyl cellulose suspension vehicle; IV: intravenous

**Table S2.** Parameter estimates obtained by fitting a 2-compartment linear pharmacokinetic model to the 4-HPR IV data (- ABT from Figure 5).

| Parameter              | Estimate* |
|------------------------|-----------|
| V1 (L/kg)              | 0.233     |
| k10 (h <sup>-1</sup> ) | 1.20      |
| k12 (h <sup>-1</sup> ) | 5.42      |
| k21 (h <sup>-1</sup> ) | 0.561     |

\*Estimates from 4-HPR IV data (see also Table 6).

**Table S3.** Statistical comparison of plasma AUC values. Analysis was based on the 95% z-confidence intervals for the dose-normalised AUC<sub>0-30h</sub> of 4-HPR in male C57Bl/6 mice following single-dose oral administration of the formulations presented in Figures 1, 3 and Supplementary Figure S1. Differences in exposure between formulations were deemed to be statistically significant where there was no overlap of the confidence intervals.

| Formulation         | 95% z-Confidence Interval for Dose-normalised AUC <sub>0-30h</sub> (μM*h) |
|---------------------|---------------------------------------------------------------------------|
| HC                  | 8.77 – 10.7                                                               |
| HPMC-SV             | 11.7 – 13.3 <sup>1</sup>                                                  |
| MDE                 | 28.0 – 38.2 <sup>2</sup>                                                  |
| (Non-dispersed) N23 | 31.6 – 39.6 <sup>2</sup>                                                  |
| (Non-dispersed) N25 | 40.5 – 45.4 <sup>3</sup>                                                  |
| (Pre-dispersed) N25 | 31.3 – 43.2 <sup>2</sup>                                                  |

<sup>1</sup> Statistically different to HC. <sup>2</sup> Statistically different to HC and HPMC-SV

<sup>3</sup> Statistically different to HC, HPMC-SV, MDE and (non-dispersed) formulation N23

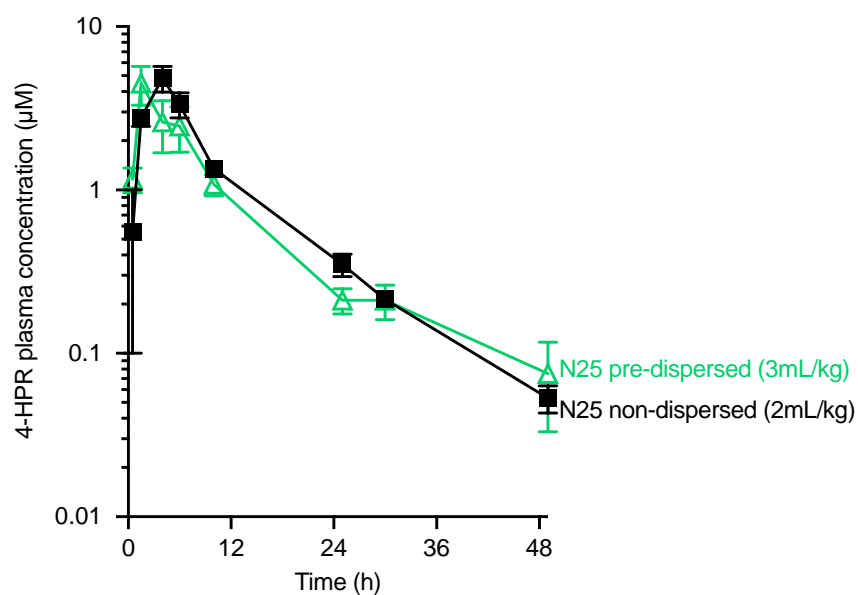

**Figure S1.** Pre-dispersion of lipid-based 4-HPR formulations does not enhance *in vivo* exposure. Mice were orally dosed with 20 mg/kg 4-HPR in self-emulsifying lipid-based formulation N25, either predispersed 1:2 (v/v) in water with vortex mixing; 3 mL/kg or non-dispersed (administered neat); 2 mL/kg. Data represent the mean  $\pm$  SD of 3 mice per time point for the plasma concentration versus time. Parameter estimates are shown in Table S4.

**Table S4.** Summary of PK analysis for 4-HPR in male C57Bl/6 mice following single-dose oral administration using pre-dispersed and non-dispersed lipid formulations.

| Parameter <sup>1</sup>             | Lipid Formulation              |                                |
|------------------------------------|--------------------------------|--------------------------------|
|                                    | Pre-dispersed N25 <sup>2</sup> | Non-dispersed N25 <sup>2</sup> |
| Average Dose (mg/kg)               | 21.2                           | 21.8                           |
| Dose Volume (mL/kg)                | 3                              | 2                              |
| Apparent t <sub>1/2</sub> (h)      | 10.5                           | 8.4                            |
| Plasma AUC <sub>0-inf</sub> (h*μM) | 36.2                           | 46.3                           |
| Plasma C <sub>max</sub> (μM)       | 4.5                            | 4.8                            |
| Plasma T <sub>max</sub> (h)        | 1.5                            | 4.0                            |
| Bioavailability (%)                | 18                             | 20                             |

<sup>1</sup>Mice were dosed as per Figure S1. <sup>2</sup>Results are based on the mean of n = 3 mice per time point.
